# Supplementary material for: In Utero Exposure to Maternal COVID-19 and Offspring Neurodevelopment Through Age 24 Months
Source: PubMed Central journal article supplement (PMC11581627; doi:10.1001/jamanetworkopen.2024.39792), 2024-10-16
Supplement: jamanetwopen-e2439792-s001.pdf [file jamanetwopen-e2439792-s001.pdf]

## Supplemental Online Content

Jaswa EG, Huddlestone HG, Lindquist KJ, et al. In utero exposure to maternal COVID-19 and offspring neurodevelopment through age 24 months. *JAMA Netw Open*. 2024;7(10):e2439792. doi:10.1001/jamanetworkopen.2024.39792

**eFigure.** Frequency of Child's Abnormal Development Screen at 12, 18, and 24 Months, by In Utero COVID-19 Exposure

**eTable 1.** Risk of Child's Abnormal Developmental Screen at 12, 18, and 24 Months, by ASQ-3 Domain

**eTable 2.** Baseline Characteristics by Inclusion Status

**eTable 3.** Adjusted Risk of Delay Including Propensity Scores for Missing Outcome Data

This supplemental material has been provided by the authors to give readers additional information about their work.

**eFigure.** Frequency of Child’s Abnormal Developmental Screen at 12, 18, and 24 Months, by In Utero COVID-19 Exposure

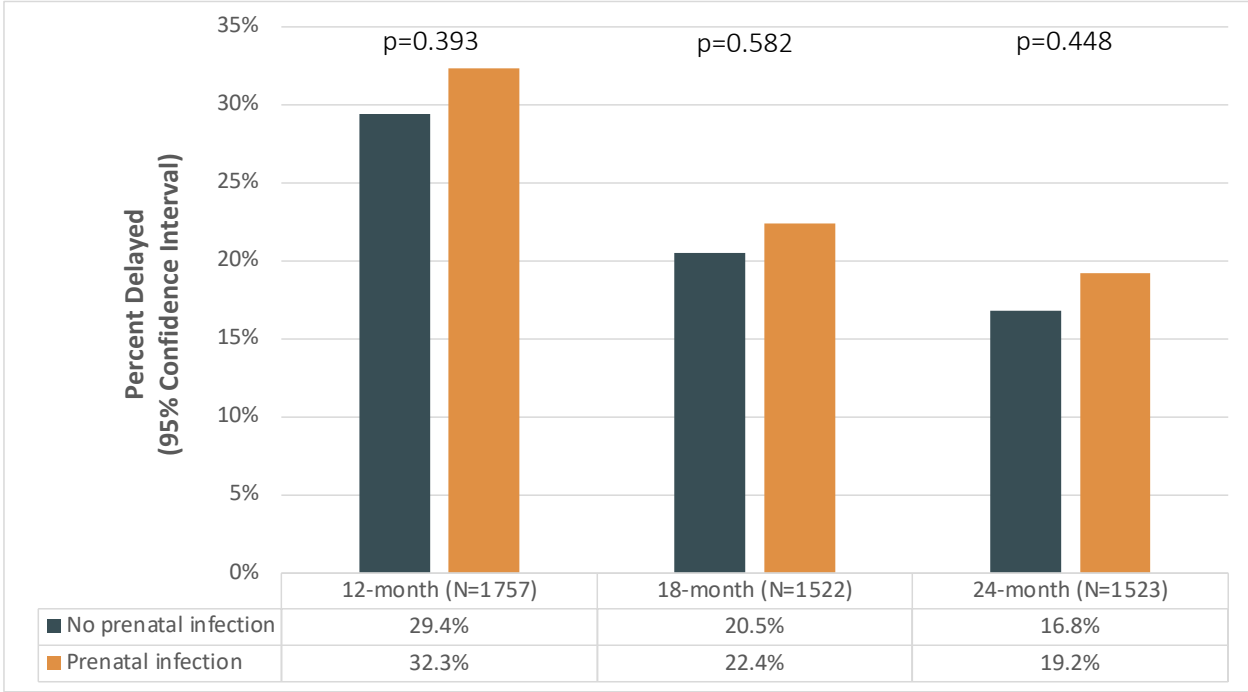

P values are by chi-squared tests.

**eTable 1. Risk of Child’s Abnormal Developmental Screen at 12, 18, and 24 Months, by ASQ-3 Domain**

| Month and ASQ-3 domain                                                    | Delay Among Unexposed No. (%) | Delay Among Exposed No. (%) | Unadjusted RR (99% CI) | Adjusted RR (99% CI) |
|---------------------------------------------------------------------------|-------------------------------|-----------------------------|------------------------|----------------------|
| Prenatal infection (ref: no prenatal infection): 12 months <sup>a,b</sup> |                               |                             |                        |                      |
| Communication skills                                                      | 54 (3.5)                      | 11 (5.6)                    | 1.65 (0.71-3.87)       | 1.21 (0.43-3.44)     |
| Gross motor skills                                                        | 235 (15.1)                    | 33 (16.7)                   | 1.09 (0.75-1.59)       | 1.12 (0.74-1.69)     |
| Fine motor skills                                                         | 79 (5.1)                      | 17 (8.6)                    | 1.82 (0.95-3.50)       | 1.52 (0.73-3.20)     |
| Problem solving skills                                                    | 157 (10.1)                    | 31 (15.7)                   | 1.57 (1.01-2.46)       | 1.56 (0.94-2.57)     |
| Social skills                                                             | 186 (11.9)                    | 29 (14.7)                   | 1.23 (0.79-1.92)       | 1.00 (0.59-1.70)     |
| Prenatal infection (ref: no prenatal infection): 18 months <sup>a,c</sup> |                               |                             |                        |                      |
| Communication skills                                                      | 46 (3.4)                      | 3 (1.9)                     | 0.67 (0.16-2.72)       | 0.75 (0.20-2.76)     |
| Gross motor skills                                                        | 84 (6.2)                      | 9 (5.6)                     | 0.90 (0.40-2.05)       | 0.87 (0.36-2.13)     |
| Fine motor skills                                                         | 71 (5.2)                      | 10 (6.2)                    | 1.29 (0.56-2.96)       | 1.23 (0.51-2.96)     |
| Problem solving skills                                                    | 183 (13.5)                    | 25 (15.5)                   | 1.14 (0.70-1.86)       | 1.22 (0.72-2.08)     |
| Social skills                                                             | 47 (3.5)                      | 5 (3.1)                     | 0.94 (0.33-2.68)       | 0.89 (0.26-3.04)     |
| Prenatal infection (ref: no prenatal infection): 24 months <sup>a,d</sup> |                               |                             |                        |                      |
| Communication skills                                                      | 107 (7.8)                     | 10 (6.6)                    | 0.87 (0.38-2.00)       | 0.71 (0.27-1.82)     |
| Gross motor skills                                                        | 80 (5.8)                      | 9 (6.0)                     | 0.91 (0.39-2.13)       | 0.91 (0.37-2.24)     |
| Fine motor skills                                                         | 73 (5.3)                      | 7 (4.6)                     | 0.92 (0.36-2.32)       | 0.76 (0.25-2.36)     |
| Problem solving skills                                                    | 59 (4.3)                      | 6 (4.0)                     | 0.90 (0.32-2.54)       | 0.77 (0.22-2.69)     |
| Social skills                                                             | 78 (5.7)                      | 13 (8.6)                    | 1.52 (0.71-3.23)       | 1.25 (0.54-2.90)     |

RR: risk ratio; CI: confidence interval.

<sup>a</sup> Estimates are generated using marginal probabilities from models containing an interaction between month and infection status. Mean imputation was used for maternal age in the adjusted model for those missing age data (12%).

A missing infant sex category was for those missing infant sex data (13%).

<sup>b</sup> ASQ data was available at 12 months for N=1559 unexposed and N=198 exposed participants.

<sup>c</sup> ASQ data was available at 18 months for N=1361 unexposed and N=161 exposed participants.

<sup>d</sup> ASQ data was available at 24 months for N=1372 unexposed and N=151 exposed participants.

**eTable 2. Baseline Characteristics by Inclusion Status**

| Baseline Characteristic                                             | Excluded<br>(N=5067) | Included<br>(N=2003) |
|---------------------------------------------------------------------|----------------------|----------------------|
|                                                                     | Patients, No. (%)    |                      |
| <b>Maternal age, mean (SD), y<sup>a</sup></b>                       | 32.7 (4.6)           | 33.3 (4.2)           |
| <b>Race<sup>b</sup></b>                                             |                      |                      |
| Asian                                                               | 217 (4.3)            | 91 (4.5)             |
| Black                                                               | 226 (4.5)            | 39 (1.9)             |
| White                                                               | 3846 (75.9)          | 1759 (87.8)          |
| Multiracial/Other <sup>c</sup>                                      | 275 (5.4)            | 75 (3.7)             |
| <b>Hispanic ethnicity<sup>d</sup></b>                               |                      |                      |
| No                                                                  | 3987 (78.7)          | 1789 (89.3)          |
| Yes                                                                 | 501 (9.9)            | 169 (8.4)            |
| <b>Education<sup>e</sup></b>                                        |                      |                      |
| Less than bachelor's degree                                         | 1536 (30.3)          | 669 (33.4)           |
| Bachelor's degree                                                   | 1964 (38.8)          | 1081 (54.0)          |
| Graduate degree                                                     | 1162 (22.9)          | 245 (12.2)           |
| <b>Household income<sup>f</sup></b>                                 |                      |                      |
| <\$50,000                                                           | 698 (13.8)           | 145 (7.2)            |
| \$50,000-\$99,000                                                   | 1215 (24.0)          | 508 (25.4)           |
| \$100,000-\$250,000                                                 | 2079 (41.0)          | 1047 (52.3)          |
| >\$250,000                                                          | 667 (13.2)           | 295 (14.7)           |
| <b>General anxiety (GAD-7)<sup>g</sup></b>                          |                      |                      |
| None-Minimal                                                        | 2528 (49.9)          | 1287 (64.3)          |
| Mild-Severe                                                         | 1871 (36.9)          | 682 (34.0)           |
| <b>Depression (PHQ-9)<sup>h</sup></b>                               |                      |                      |
| None-Minimal                                                        | 2064 (40.7)          | 1055 (52.7)          |
| Mild-Severe                                                         | 2317 (45.7)          | 901 (45.0)           |
| <b>Enrollment to vaccine availability, mean (SD), w<sup>i</sup></b> | 15.9 (12.3)          | 17.9 (13.0)          |

a Age data was missing for N=1250 participants.

b Race data by self-report; data was missing for N=503 participants.

c "Multiracial" race includes those who identified as some combination of Asian, Black, Native American, Pacific Islander, and White; "other" race indicates those who identified with groups not explicitly listed.

d Hispanic ethnicity data by self-report; data was missing for N=579 participants.

e Education data was missing for N=405 participants.

f Income data was missing for N=408 participants.

g GAD-7 refers to the General Anxiety Disorder-7 measure. Data was missing for N=668 participants.

h PHQ-9 refers to the Patient Health Questionnaire-9 measure. Data was missing for N=686 participants.

i Weeks between study enrollment and April 19, 2021, when the COVID-19 vaccine became available to all adults in the United States, including Puerto Rico and other territories. Data was missing for N=6 participants.

**eTable 3.** Adjusted Risk of Delay Including Propensity Scores for Missing Outcome Data

| Covariate                                                               | Adjusted RR (95% CI) |
|-------------------------------------------------------------------------|----------------------|
| Prenatal infection (ref: no prenatal infection): 12 months <sup>a</sup> |                      |
| Complete data (from Table 2)                                            | 1.07 (0.85-1.34)     |
| Adjusted for propensity scores <sup>b</sup>                             | 1.02 (0.81-1.30)     |
| Prenatal infection (ref: no prenatal infection): 18 months <sup>a</sup> |                      |
| Complete data (from Table 2)                                            | 1.15 (0.84-1.57)     |
| Adjusted for propensity scores <sup>b</sup>                             | 1.09 (0.79-1.51)     |
| Prenatal infection (ref: no prenatal infection): 24 months <sup>a</sup> |                      |
| Complete data (from Table 2)                                            | 1.01 (0.69-1.48)     |
| Adjusted for propensity scores <sup>b</sup>                             | 0.96 (0.64-1.42)     |

RR: risk ratio; CI: confidence interval.

<sup>a</sup>Estimates are generated using marginal probabilities from models containing an interaction between month and infection status.

<sup>b</sup> Propensity scores are calculated as  $\Pr(E=1 | X) * \Pr(O | X,E)$  where E is the exposure status and E=1 if infected, O indicates whether outcome data is available, X is the vector of baseline covariates.
