# Supplementary material for: In Utero Exposure to Maternal COVID-19 and Offspring Neurodevelopment Through Age 24 Months
Source: PubMed Central journal article supplement (PMC11581627; doi:10.1001/jamanetworkopen.2024.39792), 2024-10-16
Supplement: jamanetwopen-e2439792-s002.pdf [file jamanetwopen-e2439792-s002.pdf]

## Data Sharing Statement

Jaswa. In Utero Exposure to Maternal COVID-19 and Offspring Neurodevelopment Through Age 24 Months. *JAMA Netw Open*. Published October 16, 2024.

doi:10.1001/jamanetworkopen.2024.39792

### Data

**Data available:** Yes

**Data types:** Deidentified participant data, Data dictionary

**How to access data:** [eleni.jaswa@ucsf.edu](mailto:eleni.jaswa@ucsf.edu)

**When available:** beginning date: 07-01-2029

### Supporting Documents

**Document types:** None

### Additional Information

**Who can access the data:** Researchers whose proposed use of the data has been approved

**Types of analyses:** For a pre-approved purpose

**Mechanisms of data availability:** After approval of a proposal with a signed data access agreement
